# Supplementary material for: Comparison of the Mid-Term Outcomes of Robotic Magnetic Navigation-Guided Radiofrequency Ablation versus Cryoballoon Ablation for Persistent Atrial Fibrillation
Source: MDPI journal article supplement (doi:10.3390/jcdd9030088), 2022-03-17
Supplement: s1 [file s1]

**Table S1.** Proportional hazards assumption for Kaplan-Meier method

|                         | <i>p</i> value |
|-------------------------|----------------|
| Group (in all patients) | 0.0996         |
| Group (in Cluster1)     | 0.1096         |
| Group (in Cluster2)     | 0.5686         |

**Table S2.** Proportional hazards assumption for univariate Cox regression analysis

|                                              | <i>p</i> value |
|----------------------------------------------|----------------|
| Age                                          | 0.0602         |
| Male                                         | 0.9373         |
| BMI                                          | 0.4909         |
| Hypertension                                 | 0.9155         |
| Diabetes mellitus                            | 0.4727         |
| Stroke/TIA/thrombo-embolism                  | 0.5282         |
| Vascular disease                             | 0.0750         |
| LVEF                                         | 0.0639         |
| LAD                                          | 0.5502         |
| LAV                                          | 0.2854         |
| CHA <sub>2</sub> DS <sub>2</sub> -VASc score | 0.0473*        |
| CB                                           | 0.0996         |

BMI, body mass index; TIA, transient ischemic attack; LVEF, left ventricular ejection fractions; LAD, left atrial diameter; LAV, left atrial volume, CB, cryoballoon.

**Table S3.** Proportional hazards assumption for multivariate Cox regression analysis

|              | <i>p</i> value |
|--------------|----------------|
| Hypertension | 0.8951         |
| LVEF         | 0.1046         |
| LAV          | 0.2437         |
| CB           | 0.0949         |
| Global test  | 0.1943         |

LVEF, left ventricular ejection fractions; LAV, left atrial volume, CB, cryoballoon.

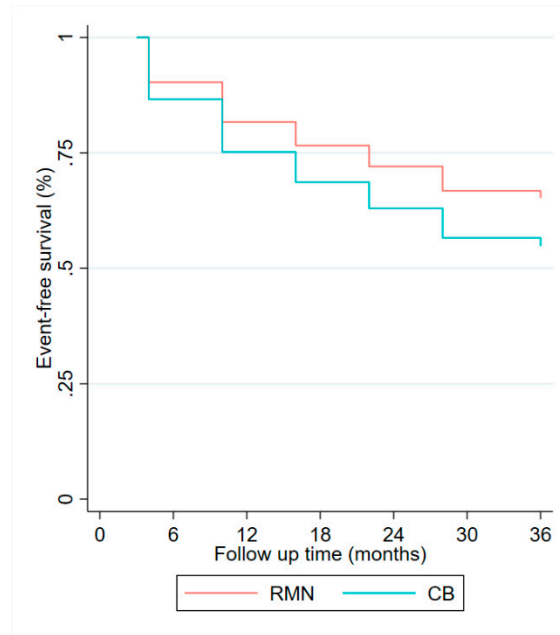

**Figure S1.** Interval-censored Cox model showing the cumulative freedom from recurrence of atrial fibrillation after RMN-guided ablation and CB ablation. The freedom from recurrence of AF did not differ between the 2 groups ( $p = 0.166$ ). RMN = robotic magnetic navigation; CB = cryoballoon.

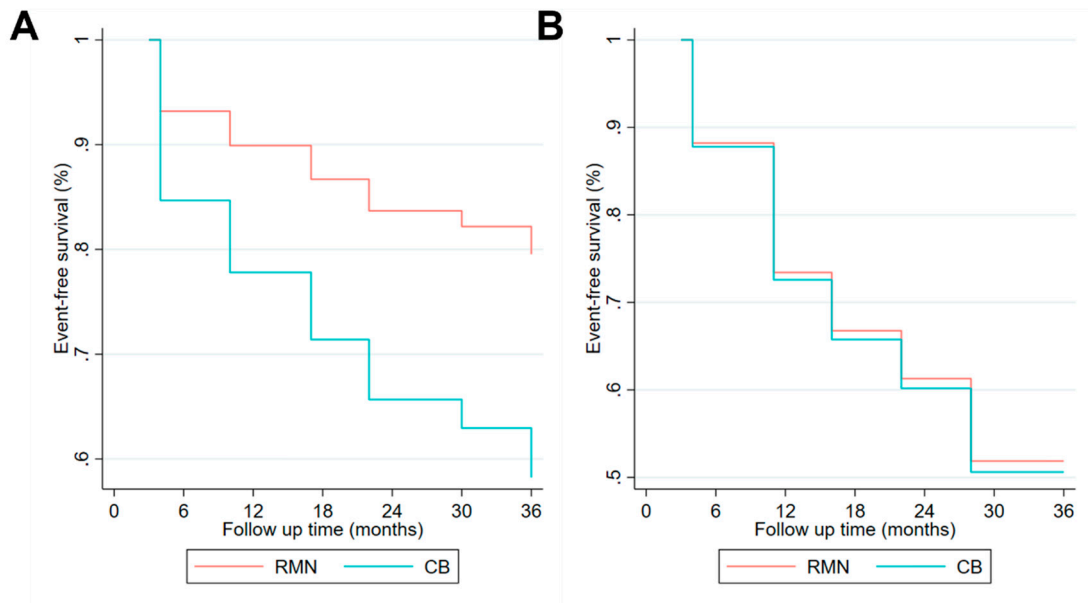

**Figure S2.** Interval-censored Cox model of the two clusters showing the cumulative freedom from recurrence of atrial fibrillation after RMN-guided ablation and CB ablation. The freedom from recurrence of AF differed significantly between RMN and CB group in cluster 1 ( $p < 0.05$ ) (A), but not in cluster 2 ( $p = 0.905$ ) (B). RMN = robotic magnetic navigation; CB = cryoballoon.
